# Supplementary material for: The Inhibitory Effect of Cyclodextrin on Oxygen Bioavailability Is a Key Factor for the Metabolic Flux Redistribution Towards Steroid Alcohols in Phytosterol Resting Cells Bioconversion
Source: Research Square preprint supplement (doi:10.21203/rs.3.rs-196986/v1), 2021-02-16
Supplement: Supplementary file 1 [file 04f35758c5bc087fe38d228a.docx]

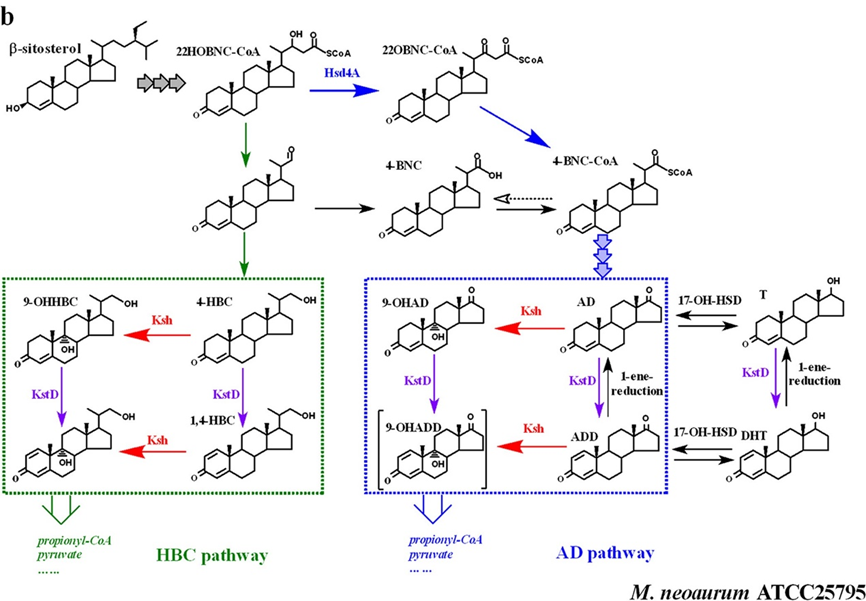


**Schematic diagram of sterol catabolism**

The scheme is referenced from Liu’s report as follow:

Liu, H.H., Xu, L.Q., Yao, K., Xiong, L.B., Tao, X.Y., Liu, M., Wang, F.Q., Wei, D.Z. (2018). Engineered 3-ketosteroid 9-hydroxylases in *mycobacterium neoaurum:* an efficient platform for production of steroid drugs. *Applied and Environmental Microbiology*, 84(14), e02777-17.
